# Supplementary material for: Long-term storable and shippable lipid bilayer membrane platform
Source: Royal Society of Chemistry journal article supplement (doi:10.1039/b807932c), 2008-01-01
Supplement: b807932c.pdf [file b807932c.pdf]

## Supporting information for “Low cost shippable lipid bilayer membrane platform”

Tae-Joon Jeon, Jason L. Poulos, Jacob J. Schmidt\*

### S1. Transportability of membrane precursors

To test the transportability of membrane precursors, the membrane precursors were shipped out via a commercial carrier, FedEx®. 54 frozen membrane precursors were shipped to Professor Andrea Tenner’s laboratory at University of California, Irvine (Irvine, CA, USA) via FedEx Express®. The tracking numbers provided were 799697382046 from UCLA to Irvine and 792543875371 from Irvine to UCLA. The shipping information and tracking documents are shown below.

#### (a) LA → Irvine

| Tracking number           | 799697382046         | Destination                       | Irvine, CA              |
|---------------------------|----------------------|-----------------------------------|-------------------------|
| Signed for by             | A.DESHPANDE          | Delivered to                      | Receptionist/Front Desk |
| Ship date                 | Aug 20, 2007         |                                   |                         |
| Delivery date             | Aug 21, 2007 8:06 AM | Service type                      | First Overnight Box     |
|                           |                      | Weight                            | 4.0 lbs.                |
| Status                    | Delivered            |                                   |                         |
| Signature image available | <a href="#">Yes</a>  |                                   |                         |
| Date/Time                 | Activity             | Location                          | Details                 |
| Aug 21, 2007              | 8:06 AM              | Delivered                         | Irvine, CA              |
|                           | 8:00 AM              | Delivery exception                | IRVINE, CA              |
|                           | 6:49 AM              | On FedEx vehicle for delivery     | IRVINE, CA              |
|                           | 6:43 AM              | At local FedEx facility           | IRVINE, CA              |
| Aug 20, 2007              | 5:27 PM              | Left origin                       | LOS ANGELES, CA         |
|                           | 5:06 PM              | Package data transmitted to FedEx | LOS ANGELES, CA         |
|                           | 5:01 PM              | Picked up                         | LOS ANGELES, CA         |

#### (b)Irvine → LA

| Tracking number           | 792543875371         | Destination                       | Los Angeles, CA         |
|---------------------------|----------------------|-----------------------------------|-------------------------|
| Signed for by             | J.POULOS             | Delivered to                      | Receptionist/Front Desk |
| Ship date                 | Aug 21, 2007         |                                   |                         |
| Delivery date             | Aug 22, 2007 8:27 AM | Service type                      | First Overnight Box     |
|                           |                      | Weight                            | 4.0 lbs.                |
| Status                    | Delivered            |                                   |                         |
| Signature image available | <a href="#">Yes</a>  |                                   |                         |
| Date/Time                 | Activity             | Location                          | Details                 |
| Aug 22, 2007              | 8:27 AM              | Delivered                         | Los Angeles, CA         |
|                           | 6:55 AM              | On FedEx vehicle for delivery     | MARINA DEL REY, CA      |
|                           | 3:38 AM              | At local FedEx facility           | MARINA DEL REY, CA      |
| Aug 21, 2007              | 8:18 PM              | At dest sort facility             | LOS ANGELES, CA         |
|                           | 6:40 PM              | Left origin                       | IRVINE, CA              |
|                           | 3:37 PM              | Picked up                         | IRVINE, CA              |
| Aug 20, 2007              | 5:20 PM              | Package data transmitted to FedEx |                         |

Figure S1: Electronic tracking documents retrieved from the FedEx® webpage.

### S2. Spontaneous thinning to form a lipid bilayer membrane from the frozen precursor in the disposable chip

The video file entitled ‘[http://schmidtlab.seas.ucla.edu/MP\\_in\\_a\\_chip.avi](http://schmidtlab.seas.ucla.edu/MP_in_a_chip.avi)’ shows the spontaneous thinning process to form a lipid bilayer membrane from a frozen membrane precursor in the disposable chip. One frame was taken per minute and the streaming rate of the movie was 15 frames per second.
